# Supplementary material for: Oral health status and behaviours of preschool children in Hong Kong
Source: PubMed Central journal article supplement (PMC3490858; doi:10.1186/1471-2458-12-767), 2012-09-11
Supplement: 1471-2458-12-767-S1.pdf [file 1471-2458-12-767-S1.pdf]

## Questionnaire (Chinese)

---

### 甲部：子女的飲食習慣

1. 你的子女現在有否用奶瓶含奶或甜味飲品的睡覺習慣？  
 有      沒有
2. 你的子女在何時停止使用奶瓶餵奶及其他甜味飲品：  
 1 至 12 個月  
 13 至 18 個月  
 19 至 24 個月  
 24 個月後  
 其他，請註明：\_\_\_\_\_
3. 除正餐以外，你的子女平均每天進食多少次？（包括汽水、果汁、零食、糖果、餅乾、水果、甜品等）  
 沒有  
 1 - 2 次  
 3 - 4 次  
 5 - 6 次  
 7 - 8 次  
 9 - 10 次  
 10 次以上

### 乙部：子女的口腔衛生習慣

4. 你的子女何時開始刷牙：  
 1 至 12 個月  
 13 至 18 個月  
 19 至 24 個月  
 24 個月後  
 其他，請註明：\_\_\_\_\_
5. 你的子女現時每日刷牙次數：  
 不刷牙      間中      每天 1 次      每天 2 次或以上
6. 有沒有旁人協助你的子女刷牙：  
 有      沒有
7. 你有否帶子女看過牙醫：  
 有，定期檢查      有，不定期      沒有
8. 你的子女有沒有用其他方法清潔口腔？（例如漱口水，牙線）  
 有  
 沒有

## 丙部：口腔健康常識

9. 蛀牙的成因是：

- |         | 是                        | 否                        | 不知道                      |
|---------|--------------------------|--------------------------|--------------------------|
| a) 吃糖太多 | <input type="checkbox"/> | <input type="checkbox"/> | <input type="checkbox"/> |
| b) 牙齒不潔 | <input type="checkbox"/> | <input type="checkbox"/> | <input type="checkbox"/> |
| c) 牙蟲侵蛀 | <input type="checkbox"/> | <input type="checkbox"/> | <input type="checkbox"/> |
| d) 熱氣   | <input type="checkbox"/> | <input type="checkbox"/> | <input type="checkbox"/> |

10. 防止蛀牙的方法是：

- |             | 是                        | 否                        | 不知道                      |
|-------------|--------------------------|--------------------------|--------------------------|
| a) 服用藥物     | <input type="checkbox"/> | <input type="checkbox"/> | <input type="checkbox"/> |
| b) 飲涼茶      | <input type="checkbox"/> | <input type="checkbox"/> | <input type="checkbox"/> |
| c) 用含氟素牙膏刷牙 | <input type="checkbox"/> | <input type="checkbox"/> | <input type="checkbox"/> |
| d) 減少吃糖次數   | <input type="checkbox"/> | <input type="checkbox"/> | <input type="checkbox"/> |

11. 氟素對牙齒的影響是：

- |          | 是                        | 否                        | 不知道                      |
|----------|--------------------------|--------------------------|--------------------------|
| a) 沒有影響  | <input type="checkbox"/> | <input type="checkbox"/> | <input type="checkbox"/> |
| b) 防止蛀牙  | <input type="checkbox"/> | <input type="checkbox"/> | <input type="checkbox"/> |
| c) 潔白牙齒  | <input type="checkbox"/> | <input type="checkbox"/> | <input type="checkbox"/> |
| d) 防止牙周病 | <input type="checkbox"/> | <input type="checkbox"/> | <input type="checkbox"/> |

12. 以下食物會引起蛀牙

- |       | 是                        | 否                        | 不知道                      |
|-------|--------------------------|--------------------------|--------------------------|
| a) 汽水 | <input type="checkbox"/> | <input type="checkbox"/> | <input type="checkbox"/> |
| b) 雪糕 | <input type="checkbox"/> | <input type="checkbox"/> | <input type="checkbox"/> |
| c) 芝士 | <input type="checkbox"/> | <input type="checkbox"/> | <input type="checkbox"/> |
| d) 花生 | <input type="checkbox"/> | <input type="checkbox"/> | <input type="checkbox"/> |

13. 牙齒出血的成因是：

- |               | 是                        | 否                        | 不知道                      |
|---------------|--------------------------|--------------------------|--------------------------|
| a) 牙齒不潔       | <input type="checkbox"/> | <input type="checkbox"/> | <input type="checkbox"/> |
| b) 牙肉間中出血是正常的 | <input type="checkbox"/> | <input type="checkbox"/> | <input type="checkbox"/> |

14. 防止牙周病的方法是：

- |              | 是                        | 否                        | 不知道                      |
|--------------|--------------------------|--------------------------|--------------------------|
| a) 刷牙以保持口腔清潔 | <input type="checkbox"/> | <input type="checkbox"/> | <input type="checkbox"/> |
| b) 鹽水漱口      | <input type="checkbox"/> | <input type="checkbox"/> | <input type="checkbox"/> |
| c) 定期洗牙      | <input type="checkbox"/> | <input type="checkbox"/> | <input type="checkbox"/> |

丁部：學生資料

15. 學生姓名：\_\_\_\_\_

16. 性別： 男     女

17. 出生日期：\_\_\_\_\_年\_\_\_\_\_月

18. 出生地點： 香港     中國大陸     其他，請註明：\_\_\_\_\_

19. 聯絡電話：\_\_\_\_\_ (以便日後跟進工作)

戊部：其他資料

20. 閣下的子女是生長在：

- 單親家庭
- 雙親家庭

21. 閣下的家庭總收入：

- HK \$ 10,000 或以下
- HK \$ 10,001 - 15,000
- HK \$ 15,001 - 20,000
- HK \$ 20,001 - 25,000
- HK \$ 25,001 - 30,000
- HK \$ 30,001 - 35,000
- HK \$ 35,001 或以上

22. 家長的教育程度：

|          | 父                        | 母                        |
|----------|--------------------------|--------------------------|
| 小學程度或以下  | <input type="checkbox"/> | <input type="checkbox"/> |
| 中學程度及預科  | <input type="checkbox"/> | <input type="checkbox"/> |
| 大專程度 或以上 | <input type="checkbox"/> | <input type="checkbox"/> |

23. 你的子女通常是由誰照顧？（請選其一）

- 父母             祖父母             家傭             其他 (如親戚朋友)

~ 多謝 ~

## Questionnaire (English)

---

### Part A: Eating Habit of Your Children

1. Is your child currently bottle-fed with milk or sugary drinks before sleeping?  
 Yes     No
  
2. When does your child stop bottle-feeding with milk or sugary drinks?  
 1 to 12 months old  
 13 to 18 months old  
 19 to 24 months old  
 After 24 months old  
 Others, please specify: \_\_\_\_\_
  
3. Other than meals, how often does your child snack? (e.g., soft drinks, juice, snack, candy, biscuits, fruits, desserts)  
 None  
 1 - 2 times  
 3 - 4 times  
 5 - 6 times  
 7 - 8 times  
 9 - 10 times  
 More than 10 times

### Part B: Oral Hygiene Habit of Children

4. When did your child start brushing teeth?  
 1 to 12 months old  
 13 to 18 months old  
 19 to 24 months old  
 After 24 months old  
 Others, please specify: \_\_\_\_\_
  
5. How many times does your child brush everyday?  
 Never     Seldom     Once     Two times or more
  
6. Does anyone assist your child in brushing his/her teeth?  
 Yes     No
  
7. Have your child ever seen a dentist?  
 Yes, with regular review     Yes, without regular review     Never
  
8. Does your child use other aids to clean his/her teeth? (e.g., mouth-rinse, dental floss)  
 Yes     No

### Part C: Oral Health Knowledge

9. The causes of dental decay include:

- |                                    | Yes                      | No                       | I don't know             |
|------------------------------------|--------------------------|--------------------------|--------------------------|
| a) Too much consumption of candies | <input type="checkbox"/> | <input type="checkbox"/> | <input type="checkbox"/> |
| b) Unclean teeth                   | <input type="checkbox"/> | <input type="checkbox"/> | <input type="checkbox"/> |
| c) Tooth worms attack              | <input type="checkbox"/> | <input type="checkbox"/> | <input type="checkbox"/> |
| d) "Hot air"                       | <input type="checkbox"/> | <input type="checkbox"/> | <input type="checkbox"/> |

10. Preventions of tooth decay include:

- |                                            | Yes                      | No                       | I don't know             |
|--------------------------------------------|--------------------------|--------------------------|--------------------------|
| a) Medicine                                | <input type="checkbox"/> | <input type="checkbox"/> | <input type="checkbox"/> |
| b) Herbal tea                              | <input type="checkbox"/> | <input type="checkbox"/> | <input type="checkbox"/> |
| c) Use of fluoridated toothpaste           | <input type="checkbox"/> | <input type="checkbox"/> | <input type="checkbox"/> |
| d) Decrease frequency of sugar consumption | <input type="checkbox"/> | <input type="checkbox"/> | <input type="checkbox"/> |

11. Effects of fluoride to teeth include:

- |                                | Yes                      | No                       | I don't know             |
|--------------------------------|--------------------------|--------------------------|--------------------------|
| a) No effect                   | <input type="checkbox"/> | <input type="checkbox"/> | <input type="checkbox"/> |
| b) Prevent tooth decay         | <input type="checkbox"/> | <input type="checkbox"/> | <input type="checkbox"/> |
| c) Tooth whitening             | <input type="checkbox"/> | <input type="checkbox"/> | <input type="checkbox"/> |
| d) Prevent periodontal disease | <input type="checkbox"/> | <input type="checkbox"/> | <input type="checkbox"/> |

12. Which of the following food can cause tooth decay?

- |                | Yes                      | No                       | I don't know             |
|----------------|--------------------------|--------------------------|--------------------------|
| a) Soft drinks | <input type="checkbox"/> | <input type="checkbox"/> | <input type="checkbox"/> |
| b) Ice-cream   | <input type="checkbox"/> | <input type="checkbox"/> | <input type="checkbox"/> |
| c) Cheese      | <input type="checkbox"/> | <input type="checkbox"/> | <input type="checkbox"/> |
| d) Peanuts     | <input type="checkbox"/> | <input type="checkbox"/> | <input type="checkbox"/> |

13. The causes of gum bleeding include:

- |                              | Yes                      | No                       | I don't know             |
|------------------------------|--------------------------|--------------------------|--------------------------|
| a) Unclean teeth             | <input type="checkbox"/> | <input type="checkbox"/> | <input type="checkbox"/> |
| b) It is a normal phenomenon | <input type="checkbox"/> | <input type="checkbox"/> | <input type="checkbox"/> |

14. Methods to prevention of periodontal disease include:

- |                                                  | Yes                      | No                       | I don't know             |
|--------------------------------------------------|--------------------------|--------------------------|--------------------------|
| a) Tooth brushing                                | <input type="checkbox"/> | <input type="checkbox"/> | <input type="checkbox"/> |
| b) Saline mouth-rinsing                          | <input type="checkbox"/> | <input type="checkbox"/> | <input type="checkbox"/> |
| c) Regular scaling (professional tooth cleaning) | <input type="checkbox"/> | <input type="checkbox"/> | <input type="checkbox"/> |

## Part D: Student Information

15. Name of Student: \_\_\_\_\_
16. Gender :  M  F
17. Date of birth : \_\_\_\_/\_\_\_\_/\_\_\_\_ (DD / MM / YYYY)
18. Place of birth :  Hong Kong  China  Others, please specify:  
\_\_\_\_\_
19. Contact number : \_\_\_\_\_ (for follow-ups)

## Part E: Other Information

20. Home situation:  
 Both parents  
 Others
21. Monthly family income:  
 HK \$ 10,000 or below  
 HK \$ 10,001 - 15,000  
 HK \$ 15,001 - 20,000  
 HK \$ 20,001 - 25,000  
 HK \$ 25,001 - 30,000  
 HK \$ 30,001 - 35,000  
 HK \$ 35,001 or above
22. Parent education level:
- |                   | Father                   | Mother                   |
|-------------------|--------------------------|--------------------------|
| Elementary school | <input type="checkbox"/> | <input type="checkbox"/> |
| High school       | <input type="checkbox"/> | <input type="checkbox"/> |
| Collage or above  | <input type="checkbox"/> | <input type="checkbox"/> |
23. Who usually take care of your child? (Please choose one)  
 Parents  Grandparents  
 Domestic helper  Others (e.g., relatives, friends)

~ Thank you ~
